# Supplementary material for: Comparative life cycle assessment of corn stover conversion by decentralized biomass pyrolysis-electrocatalytic hydrogenation versus ethanol fermentation
Source: Royal Society of Chemistry journal article supplement (doi:10.1039/d2se00055e), 2022-12-21
Supplement: d2se00055e1.pdf [file d2se00055e1.pdf]

## Supplementary Information File

### Life Cycle Inventory:

Life cycle data were collected from literature sources and evaluated using data quality indicators, as described by the modified Weidema method in Table S1.<sup>1</sup> The scoring range is from 1-5, with 1 indicating that the data is most reliable while 5 is least reliable. Each item was qualified using a 6-digit score, with each digit ranging from 1 to 5. Each digit represents the reliability of the data in each of the 6 categories, with the first digit representing evaluation criteria A and the last digit representing criteria F, respectively.

**Table S1: Evaluation criteria in the modified Weidema method and description of scores (adapted from Couillard et al.).<sup>2</sup>**

|          | <b>Evaluation criteria</b>           | <b>Description</b>                                                                        | <b>Scoring range</b>                                                                                       |
|----------|--------------------------------------|-------------------------------------------------------------------------------------------|------------------------------------------------------------------------------------------------------------|
| <b>A</b> | <b>Acquisition method</b>            | Method of acquiring the data, whether measured directly or estimated based on assumptions | 1: measured data<br>5: non-qualified estimate                                                              |
| <b>B</b> | <b>Independence of data supplier</b> | Source of information and its bias towards the concerned study                            | 1: independent verified source<br>5: unverified source with bias                                           |
| <b>C</b> | <b>Representativeness</b>            | Degree of application of data to even out fluctuations                                    | 1: representative data from sufficiently large samples<br>5: incomplete data from relatively small samples |
| <b>D</b> | <b>Data age</b>                      | Temporal relevance of data                                                                | 1: less than 3 years<br>5: unknown or greater than 20 years                                                |
| <b>E</b> | <b>Geographical correlation</b>      | Spatial relevance of data                                                                 | 1: data from area under study<br>5: data from area unknown or different conditions                         |
| <b>F</b> | <b>Technological correlation</b>     | Technological relevance of data with processes in study                                   | 1: data from processes under study<br>5: data from related processes but different technology              |

**Table S2: Life cycle input data for both Py-ECH and CE systems with their source and data quality indicator score.**

| Parameter                                                      | Value                   | Source                      | Data quality indicator (ABCDEF) |
|----------------------------------------------------------------|-------------------------|-----------------------------|---------------------------------|
| Technical data for Py-ECH system                               |                         | Lam et al. <sup>3</sup>     | 211111                          |
| Technical data for CE system                                   |                         | Humbird et al.              | 211321                          |
| Annual C sequestration rate                                    | 0.174 Mg C/ha/yr        | GREET <sup>4</sup>          | 211321                          |
| Corn stover storage losses                                     | 8.40%                   | GREET <sup>4</sup>          | 211321                          |
| Corn stover transport losses                                   | 2.00%                   | GREET <sup>4</sup>          | 211321                          |
| Corn stover farm handling losses                               | 2.00%                   | GREET <sup>4</sup>          | 211321                          |
| Diesel for harvesting corn stover                              | 3.58 gallons/acre       | GREET <sup>4</sup>          | 211321                          |
| Fraction of N leached to surface waters                        | 24% of total applied N  | GREET <sup>4</sup>          | 211321                          |
| Fraction of P leached to surface waters                        | 7% of total applied P   | Powers et al. <sup>5</sup>  | 311421                          |
| Fraction of fertilizer N emitted as NO                         | 0.8% of total applied N | GREET <sup>4</sup>          | 211321                          |
| Fraction of fertilizer N emitted as NH <sub>3</sub>            | 10% of total applied N  | IPCC <sup>6</sup>           | 211421                          |
| Fraction of fertilizer N emitted as N <sub>2</sub> O           | 1.5% of total applied N | GREET <sup>4</sup>          | 211321                          |
| Corn stover yield                                              | 2.39 dry ton/acre       | GREET <sup>4</sup>          | 211321                          |
| Distance from field to refinery for CE system                  | 50 miles                | Kim et al. <sup>7</sup>     | 212122                          |
| Weight limitation on trucks                                    | 80,000 lbs              | Edwards et al. <sup>8</sup> | 221311                          |
| Distance from refinery to pumps for both Py-ECH and CE systems | 110 miles               | Kumar et al. <sup>9</sup>   | 212322                          |

Using the life cycle data in Table S2, the technical data from our previous work,<sup>3</sup> and the Humbird et al. report,<sup>10</sup> the contribution of all operations to each impact category was calculated for the Py-ECH and CE systems, respectively. These have been tabulated in Tables S3, S4, and S5.

**Table S3: Contribution of different operations to greenhouse gas emissions (GHG) for CE and Py-ECH systems.**

| Operations | Allocation Method 1 |           | Allocation Method 2 |           |
|------------|---------------------|-----------|---------------------|-----------|
|            | CE                  | Py-ECH(F) | CE                  | Py-ECH(F) |
|            |                     |           |                     |           |

|                                     | <i>(g CO<sub>2</sub>/MJ)</i> |        | <i>(g CO<sub>2</sub>/MJ)</i> |        |
|-------------------------------------|------------------------------|--------|------------------------------|--------|
| <b>Supply Chain:</b>                |                              |        |                              |        |
| <i>Harvesting</i>                   | 5.51                         | 2.09   | 5.51                         | 2.09   |
| <i>Fertilizer Application</i>       | 3.09                         | 1.17   | 1.26                         | 4.78   |
| <i>Fertilizer Production</i>        | 3.15                         | 1.19   | 8.33                         | 7.36   |
| <i>Below ground C Sequestration</i> | 0.00                         | 0.00   | -13.70                       | -5.19  |
| <i>Feedstock Biomass to Energy</i>  | -235.00                      | -64.20 | -235.00                      | -64.20 |
| <i>Corn Stover Losses</i>           | 5.35                         | 2.03   | 5.35                         | 2.03   |
| <b>Processing</b>                   |                              |        |                              |        |
| <i>Heat and Power</i>               | 132.00                       | 12.40  | 132.00                       | 12.40  |
| <i>Fermentation CO<sub>2</sub></i>  | 39.50                        | 0.00   | 39.50                        | 0.00   |
| <i>Feedstock Biomass to Biochar</i> | 0.00                         | -13.30 | 0.00                         | -13.30 |
| <i>Electricity</i>                  | -12.40                       | 84.80  | -12.40                       | 84.80  |
| <b>Transport</b>                    |                              |        |                              |        |
| <i>Transportation</i>               | 1.46                         | 0.37   | 1.46                         | 0.37   |
| <b>Combustion</b>                   |                              |        |                              |        |
| <i>Fuel Combustion</i>              | 71.00                        | 64.10  | 71.00                        | 64.10  |

**Table S4: Contribution of different operations to eutrophication potential (EUP) for CE and Py-ECH systems.**

| <b>Operations</b>             | <b>Allocation Method 1</b>    |                  | <b>Allocation Method 2</b>    |                  |
|-------------------------------|-------------------------------|------------------|-------------------------------|------------------|
|                               | <b>CE</b>                     | <b>Py-ECH(F)</b> | <b>CE</b>                     | <b>Py-ECH(F)</b> |
|                               | <i>(mg CO<sub>2</sub>/MJ)</i> |                  | <i>(mg CO<sub>2</sub>/MJ)</i> |                  |
| <b>Supply Chain:</b>          |                               |                  |                               |                  |
| <i>Harvesting</i>             | 4.18                          | 1.58             | 4.18                          | 1.58             |
| <i>Fertilizer Application</i> | 6.86                          | 2.60             | 28.00                         | 10.60            |
| <i>Nitrogen Runoff</i>        | 111.00                        | 42.00            | 452.00                        | 171.00           |
| <i>Phosphorus Runoff</i>      | 70.20                         | 26.60            | 139.00                        | 52.70            |
| <i>Fertilizer Production</i>  | 0.35                          | 0.13             | 0.80                          | 0.66             |
| <b>Processing</b>             |                               |                  |                               |                  |
| <i>Refinery Operations</i>    | 15.10                         | 0.66             | 15.10                         | 0.66             |
| <i>Electricity</i>            | -0.43                         | 2.94             | -0.43                         | 2.94             |
| <b>Transport</b>              |                               |                  |                               |                  |
| <i>Transportation</i>         | 1.46                          | 0.37             | 1.46                          | 0.37             |
| <b>Combustion</b>             |                               |                  |                               |                  |
| <i>Fuel Combustion</i>        | 71.00                         | 64.10            | 71.00                         | 64.10            |

**Table S5: Contribution of different operations to water scarcity footprint (WSF) for CE and Py-ECH systems.**

| <i>Operations</i>            | <i>Allocation Method 1</i>   |                  | <i>Allocation Method 2</i>   |                  |
|------------------------------|------------------------------|------------------|------------------------------|------------------|
|                              | <i>CE</i>                    | <i>Py-ECH(F)</i> | <i>CE</i>                    | <i>Py-ECH(F)</i> |
|                              | <i>(L H<sub>2</sub>O/MJ)</i> |                  | <i>(L H<sub>2</sub>O/MJ)</i> |                  |
| <i>Supply Chain:</i>         |                              |                  |                              |                  |
| <i>Farming</i>               | 0.00                         | 0.00             | 12.80                        | 4.85             |
| <i>Fertilizer Production</i> | 0.006                        | 0.002            | 0.009                        | 0.004            |
| <i>Processing</i>            |                              |                  |                              |                  |
| <i>Refinery Operations</i>   | 2.42                         | 0.38             | 2.42                         | 0.38             |
| <i>Electricity</i>           | -0.32                        | 2.18             | -0.32                        | 2.18             |
| <i>Transport</i>             |                              |                  |                              |                  |
| <i>Transportation</i>        | 0.00                         | 0.00             | 0.00                         | 0.00             |
| <i>Combustion</i>            |                              |                  |                              |                  |
| <i>Fuel Combustion</i>       | 0.00                         | 0.00             | 0.00                         | 0.00             |

**Table S6: Life cycle impact summary for the CE process. Allocation methods 1 and 2 are reported to observe the effects of avoiding allocation and applying minimal allocation to cultivation.**

| <i>Allocation</i>   | <i>GHG</i>                     |           | <i>EUP</i>       |          | <i>WSF</i>                 |          |
|---------------------|--------------------------------|-----------|------------------|----------|----------------------------|----------|
|                     | <i>1</i>                       | <i>2</i>  | <i>1</i>         | <i>2</i> | <i>1</i>                   | <i>2</i> |
|                     | <i>g CO<sub>2</sub> eq /MJ</i> |           | <i>g N eq/MJ</i> |          | <i>L H<sub>2</sub>O/MJ</i> |          |
| <i>Supply Chain</i> | -2.18E+02                      | -2.17E+02 | 1.92E-01         | 6.24E-01 | 5.98E-02                   | 1.29E+01 |
| <i>Processing</i>   | 1.60E+02                       | 1.60E+02  | 1.46E-02         | 1.46E-02 | 2.10E+00                   | 2.10E+00 |
| <i>Transport</i>    | 1.46E+00                       | 1.46E+00  | 3.02E-05         | 3.02E-05 | 0                          | 0        |
| <i>Combustion</i>   | 7.10E+01                       | 7.10E+01  | 1.11E-03         | 1.11E-03 | 0                          | 0        |
| <b>TOTAL</b>        | 1.44E+01                       | 1.54E+01  | 2.08E-01         | 6.39E-01 | 2.16E+00                   | 1.50E+01 |

**Table S7: Life cycle impact summary for the Py-ECH process. Allocation methods 1 and 2 are reported to observe the effects of avoiding allocation and applying minimal allocation to cultivation.**

| <i>Allocation</i> | <i>GHG</i>                     |          | <i>EUP</i>       |          | <i>WSF</i>                 |          |
|-------------------|--------------------------------|----------|------------------|----------|----------------------------|----------|
|                   | <i>1</i>                       | <i>2</i> | <i>1</i>         | <i>2</i> | <i>1</i>                   | <i>2</i> |
|                   | <i>g CO<sub>2</sub> eq /MJ</i> |          | <i>g N eq/MJ</i> |          | <i>L H<sub>2</sub>O/MJ</i> |          |

|                     |           |           |          |          |          |          |
|---------------------|-----------|-----------|----------|----------|----------|----------|
| <b>Supply Chain</b> | -5.77E+01 | -5.31E+01 | 7.29E-02 | 2.37E-01 | 2.27E-02 | 4.89E+00 |
| <b>Processing</b>   | 8.11E+01  | 8.11E+01  | 3.60E-03 | 3.60E-03 | 2.56E+00 | 2.56E+00 |
| <b>Transport</b>    | 3.68E-01  | 3.68E-01  | 7.61E-06 | 7.61E-06 | 0        | 0        |
| <b>Combustion</b>   | 6.41E+01  | 6.41E+01  | 1.07E-03 | 1.07E-03 | 0        | 0        |
| <b>TOTAL</b>        | 8.78E+01  | 8.82E+01  | 7.76E-02 | 2.41E-01 | 2.58E+00 | 7.45E+00 |

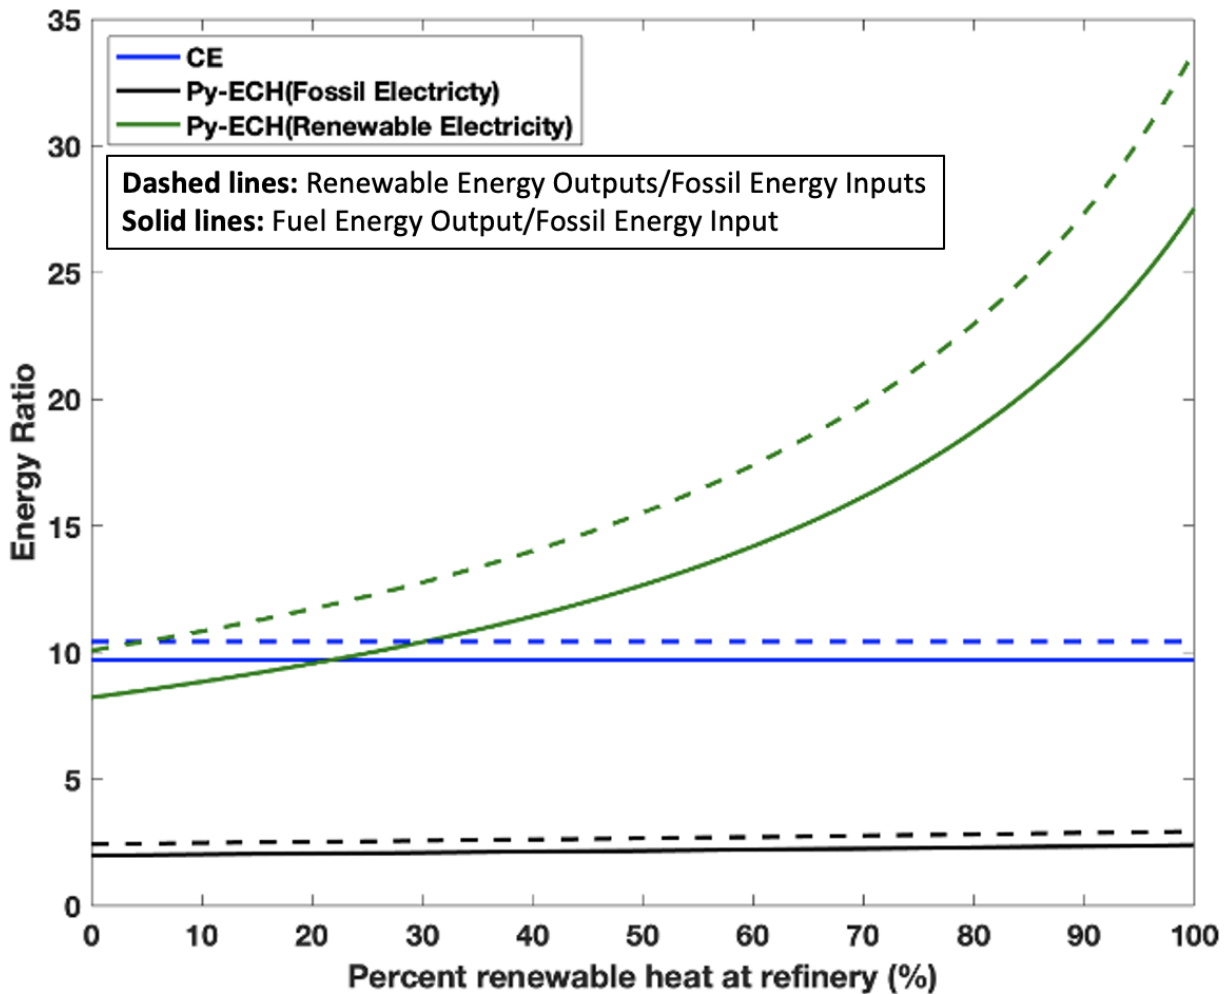

**Figure S1:** Sensitivity of system  $RF$  and  $ER_f$  with % renewable heat at refinery. Fossil electricity implies all the electricity is provided by the MRO-West electrical grid; Renewable electricity implies that all the electricity being provided is from renewable sources. The breakeven is at about 25% renewable heat and 100% renewable electricity.

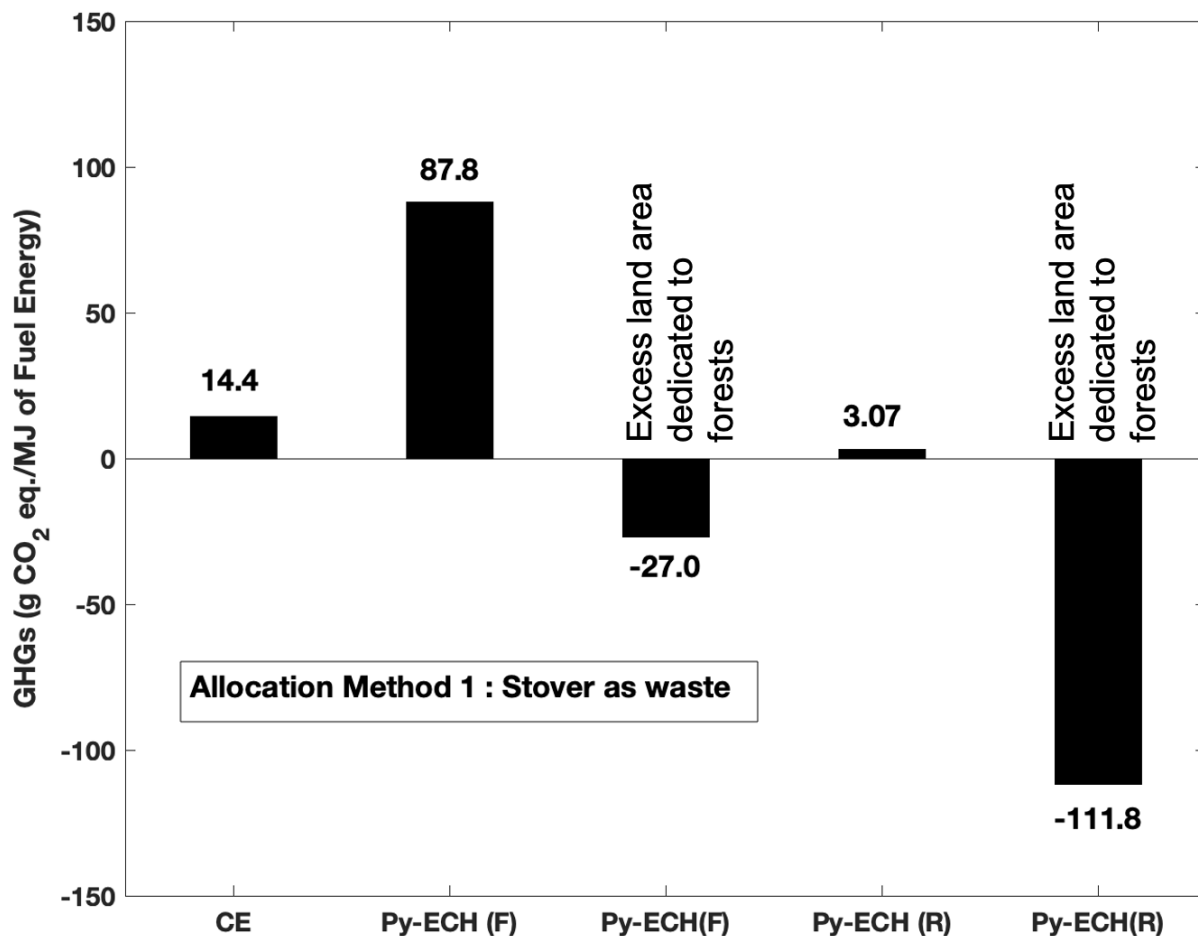

**Figure S2:** Net GHG emissions of Py-ECH and CE processes using allocation method 1 on a “per MJ fuel energy” basis; ‘F’ indicates 2020 electrical grid including 70.8% fossil electricity and ‘R’ refers fully renewable power. Excess land area of ~0.2 million hectares. The annual rate of carbon accumulation in forests can vary from 0.8 tonnes/ha/yr to 5.1 tonnes/ha/yr, depending on the type of forest.<sup>11</sup> The CCLUB model from GREET estimates an annual carbon sequestration rates from forests in the United States at 2.4 tonnes C/ha/yr, which is well within this range. The annual carbon sequestration rate for forests have been assumed conservatively to be 0.8 tonnes/ha/yr.

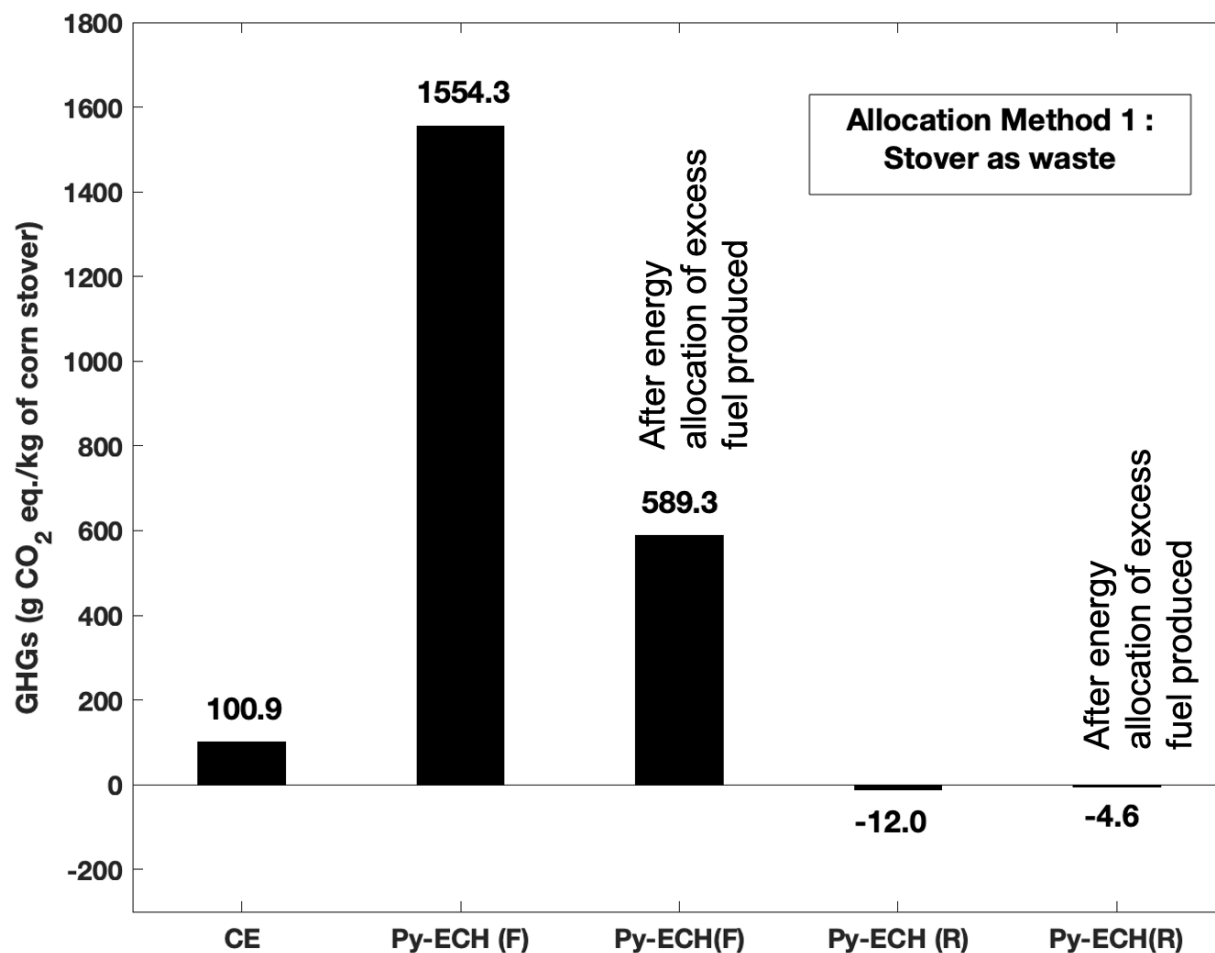

**Figure S3:** Net GHG emissions of Py-ECH and CE processes using allocation method 1 on a “per kg corn stover processed” basis; ‘F’ indicates 2020 electrical grid including 70.8% fossil electricity and ‘R’ refers fully renewable power. Excess fuel energy of of ~11-12 MJ is produced in the Py-ECH process per kg corn stover processed. An energy allocation percentage of~ 38% has been applied as the fuel energy of the primary product must be made equal to the fuel energy of the CE process, which is about ~7 MJ/kg corn stover processed.

#### References:

1. M. W. Toffel and A. Horvath, *Environmental Science & Technology*, 2004, **38**, 2961-2970.
2. S. Couillard, G. Bage and J.-S. Trudel, *Comparative Life Cycle Assessment (LCA) of Artificial vs Natural Christmas Tree*, Report 1043-RF3-09, 2009.
3. C. H. Lam, S. Das, N. C. Erickson, C. D. Hyzer, M. Garedew, J. E. Anderson, T. J. Wallington, M. A. Tamor, J. E. Jackson and C. M. Saffron, *Sustainable Energy & Fuels*, 2017, **1**, 258-266.
4. M. Wang, *The Greenhouse Gases, Regulated Emissions, and Energy Use in Transportation Model*, Argonne National Laboratory, Argonne, Illinois, 1999.
5. S. E. Powers, *Quantifying Cradle-to-Farm Gate Life-Cycle Impacts Associated with Fertilizer Used for Corn, Soybean, and Stover Production* NREL, Golden, Colorado, 2005.

6. IPCC, *Revised 1996 IPCC Guidelines for National Greenhouse Gas Inventories*, 1996.
7. S. Kim, X. Zhang, B. E. Dale, A. D. Reddy, C. D. Jones, K. Cronin, R. C. Izaurrealde, T. Runge and M. Sharara, *Biofuels, Bioproducts & Biorefining*, 2018, **12**, 203-212.
8. W. Edwards, *Economics of Harvesting and Transporting Corn Stover* Iowa State University, 2014.
9. D. Kumar and G. Murthy, *The International Journal of Life Cycle Assessment*, 2012, **17**, 388-401.
10. D. Humbird, R. Davis, L. Tao, C. Kinchin, D. Hsu, A. Aden, P. Schoen, J. Lukas, B. Olthof and M. Worley, *Process design and economics for biochemical conversion of lignocellulosic biomass to ethanol: dilute-acid pretreatment and enzymatic hydrolysis of corn stover*, Report NREL/TP-5100-47764, National Renewable Energy Laboratory (NREL), Golden, CO., 2011.
11. S. Brown, J. Sathaye, M. Cannell and P. E. Kauppi, *Management of Forests for Mitigation of Greenhouse Gas Emissions*, 1995.
